# Supplementary material
Source: Springer Nature journal article supplement (https://www.springermedizin.de/resource/supplementary/13012_2014_769_MOESM1_ESM.pdf/9630654)
Supplement: MOESM1 [file 9630654]

## Literature review

Components of interventions that have been successfully used in the implementation of clinical practice guidelines

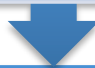

## Iterative workshops

ACI Urology Clinical Network Members (N=25)

Interviews with nursing and radiation oncology staff

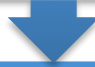

National survey of urologists to explore current knowledge, attitudes and practice and wider context

Urologist members of the Urological Society of Australia and New Zealand (USANZ) (N=157), 45% response rate

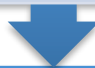

Semi-structured interviews to identify site specific needs and barriers

Cancer Care Nurse Coordinators (N=7)

Radiation Oncologists (N=10)

Urologist Clinical Leaders (N=9)

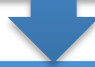

## Consumer feedback

ACI Urology Clinical Network Consumer Representatives: What patients want from their urologist at prostate cancer diagnosis (N≈15)

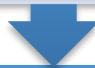

Consultation with Cancer Care Action Advisory Group

Evaluate feasibility with policy agencies – 3 June 2013
